# Supplementary material for: Testicular seminoma clinical stage 1: treatment outcome on a routine care level
Source: PubMed Central journal article supplement (PMC4899489; doi:10.1007/s00432-016-2162-z), 2016-04-26
Supplement: 432_2016_2162_MOESM1_ESM.pdf [file 432_2016_2162_MOESM1_ESM.pdf]

### **Online resource 1:**

**Contributing Institutions** ranked by the number of cases enrolled

Hamburg, Bundeswehr Krankenhaus

Hamburg, Albertinen-Krankenhaus

Tuebingen, Urologische Universitätsklinik

Trier, Krankenhaus der Barmherzigen Brüder

Mannheim, Urologische Universitätsklinik

Lohne, St. Franziskus Krankenhaus

Bonn, Urologische Universitätsklinik

Siegen, Jung-Stilling Krankenhaus

Ahaus, St. Marien Krankenhaus

Chemnitz, Zeisigwaldkliniken

Leipzig, St. Elisabeth Krankenhaus

Berlin, St. Hedwig Krankenhaus

Freiburg, Universitätsklinik

Karlsruhe, Städtisches Klinikum

Gladbeck, St. Barbara Hospital

Bergisch Gladbach, Marien-Krankenhaus

Köln, Heilig Geist Krankenhaus

Köln, Urologia

Magdeburg, Universitätsklinik

Münster, Universitätsklinik

Reichenbach, Paracelsus-Klinik

Amberg, Klinikum St. Marien

Berlin, Bundeswehrkrankenhaus

Coburg, Städtisches Klinikum

Kaiserslautern, Westpfalzkllinikum

Gütersloh, Städtisches Klinikum

München, Klinikum Bogenhausen

Ulm, Bundeswehrkrankenhaus

Würzburg, Julius Maximilian Universität

Frankfurt, Universitätsklinik

Fulda, Klinikum

Rüsselsheim, Klinikum

Schweinfurt, Leopoldina-Krankenhaus

Erlangen, Waldkrankenhaus St. Marien

Flensburg, Diako Klinikum

Frankfurt, Städtische Kliniken Höchst

Klinikum Ingolstadt

Köln, St. Elisabeth Krankenhaus

Lübbecke, Krankenhaus

Bad Tölz, Asklepios Stadtklinik

Hamm, St. Barbara Klinik

Herzberg, Urologie Herzberg

Jena, Urologische Universitätsklinik  
Löningen, St. Anna Stift  
Mönchengladbach, Maria Hilf Krankenhaus  
Schwäbisch Hall, Diakonie Klinikum  
Aachen, Urologische Universitätsklinik  
Freiberg, Kreiskrankenhaus  
Gera, Waldklinikum  
Göttingen, Urologische Universitätsklinik  
Geestland, Seepark Klinik  
Plauen, Helios Klinikum  
Aschersleben, Kreiskliniken  
Berlin, Universitätsklinikum Charité  
Bonn, Waldkrankenhaus  
Erfurt, Krankenhaus St. Nepomuk  
HamelN, Kreiskrankenhaus  
Koblenz, Bundeswehrkrankenhaus  
Lübeck, Universitätsklinikum Schleswig-Holstein  
Reifenstein, Eichsfeld Klinikum  
Wetzlar, Klinikum  
Datteln, St. Vincenz Krankenhaus  
Fürth, Klinikum  
Garmisch-Partenkirchen, Klinikum  
Gießen, Urologische Universitätsklinik  
Kempten, Klinikum  
Köln, Urologische Universitätsklinik  
Mannheim, Diakonie-Krankenhaus  
Pforzheim, Siloah St. Trudpert Klinikum  
Schwerin, Helios Kliniken  
Stralsund, Helios Hanse Klinikum  
Wilhelmshaven, Reinhard-Nieter-Krankenhaus  
Bad Bergzabern, Klinikum Landau  
Baden-Baden, Stadt-Krankenhaus  
Bautzen, Oberlausitzkliniken  
Berlin, Helios Kliniken  
Berlin, Vivantes Auguste-Victoria-Krankenhaus  
Dresden, Diakonissenkrankenhaus  
Fürstfeldbruck, Urologisches Zentrum  
Hamm, St. Josef Krankenhaus  
Homburg, Urologische Universitätsklinik  
Münster, Herz-Jesu-Krankenhaus  
Nürnberg, ÜGP  
Solingen, Städtisches Klinikum  
Ulm, Urologische Universitätsklinik  
Augsburg, Klinikum  
Bad Hersfeld, Klinikum

Bamberg, Klinikum Bruderwald  
Bonn, Malteser Krankenhaus  
Detmold, Klinikum Lippe  
Frankfurt, Praxisklinik  
Gehrden, Robert-Koch-Krankenhaus  
Göttingen, Evangelisches Krankenhaus Weende  
Hamburg, Praxisklinik  
Hamburg, Praxisklinik  
Hamburg, Universitätsklinikum Eppendorf  
Hannover, Friederikenstift  
Heidelberg, Krankenhaus Salem  
Itzehoe, Klinikum  
Lauchhammer, Klinikum Niederlausitz  
Lüdenscheid, Märkische Kliniken  
Magdeburg, Klinikum  
Nürnberg, Theresien-KH  
Rostock, Urologische Universitätsklinik  
Schwedt, Asklepios Klinik  
Stuttgart, Katharinenhospital  
Würzburg, Juliusospital  
Amberg, Praxisklinik  
Bad Nauheim, Praxisklinik  
Bitburg, Praxisklinik Dres. Zender/Müller  
Bremen Praxisklinik am Klinikum Bremen-Nord  
Bremen, Klinikum Bremen-Mitte  
Deggendorf, Klinikum  
Dessau, Diakonie-Krankenhaus  
Frechen, St. Katharinen Krankenhaus  
Hamburg, Asklepios Klinik Barmbek  
Hamburg, Praxisklinik  
Hannover, Siloah Krankenhaus  
Herne, Marienhospital  
Kempen, Hospital zum Heiligen Geist  
Köln, Krankenhaus Holweide  
Markredwitz, Klinikum Fichtelgebirge  
Memmingen, Klinikum  
München, Urologische Universitätsklinik Großhadern  
Pfullingen, Praxisklinik  
Schwedt, Klinikum Uckermark  
Weiden, Klinikum  
Wesel, Marien-Hospital  
Zirndorf, Praxisklinik
