# Supplementary material for: Testicular seminoma clinical stage 1: treatment outcome on a routine care level
Source: Springer Nature journal article supplement (doi:10.1007/s00432-016-2162-z), 2016-04-26
Supplement: MOESM2 [file 10049166]

**Table (online resource 2) List of individual data of relapsing patients**

| #  | Tumour size (cm) | RTI | treatment    | Age at diagnosis (yrs) | Time to relapse (mon) | Localisation of relapse                         | Treatment for relapse |
|----|------------------|-----|--------------|------------------------|-----------------------|-------------------------------------------------|-----------------------|
| 1  | 5.2              | no  | 1 x Carbo    | 19                     | 6                     | lungs                                           | 3 x PEB               |
| 2  | 2.4              | no  | 1 x Carbo    | 42                     | 12                    | retroperitoneal lymph nodes                     | radiotherapy          |
| 3  | 6.8              | yes | 1 x Carbo    | 34                     | 18                    | retroperitoneal lymph nodes                     | PEB                   |
| 4  | 6                | yes | 1 x Carbo    | 71                     | 12                    | retroperitoneal lymph nodes                     | n/a                   |
| 5  | 3.5              | yes | 1 x Carbo    | 46                     | 18                    | retroperitoneal lymph nodes (bulky disease)     | n/a                   |
| 6  | 8                | yes | 1 x Carbo    | 48                     | 12                    | inguinal lymph node                             | 3 x PEB               |
| 7  | 4.5              | yes | 1 x Carbo    | 46                     | 12                    | retroperitoneal lymph nodes ,13mm               | 3 x PEB               |
| 8  | 8                | yes | 1 x Carbo    | 49                     | 9                     | retroperitoneal lymph nodes                     | 3 x PEB               |
| 9  | 5.1              | no  | 1 x Carbo    | 35                     | 12                    | iliacal and retroperitoneal lymph nodes         | 3 x PEB+ pcRLA        |
| 10 | 2.7              | no  | 1 x Carbo    | 47                     | 24                    | retroperitoneal lymph nodes                     | 3 x PEB               |
| 11 | n/a              | n/a | 1 x Carbo    | 43                     | 48                    | retroperitoneal lymph nodes                     | 3 x PEB               |
| 12 | 4.5              | n/a | 1 x Carbo    | 34                     | 12                    | retroperitoneal lymph nodes                     | 3 x PEB               |
| 13 | 5.5              | no  | 1 x Carbo    | 24                     | 12                    | retroperitoneal lymph nodes                     | Radiotherapy 36 Gy    |
| 14 | 6                | yes | 1 x Carbo    | 52                     | 12                    | iliacal lymph node, 2.1cm                       | Radiotherapy, 36 Gy   |
| 15 | 6                | yes | 1 x Carbo    | 26                     | 24                    | retroperitoneal lymph node ,1.3cm               | 3 x PEB               |
| 16 | n/a              | yes | 1 x Carbo    | 32                     | 24                    | iliacal lymph nodes                             | 3 x PEB               |
| 17 | 3.8              | yes | 1 x Carbo    | 32                     | 24                    | retroperitoneal lymph nodes                     | 3 x PEB               |
| 18 | 7.5              | yes | 1 x Carbo    | 51                     | 36                    | cervical lymph nodes                            | 3 x PEB               |
| 19 | 12               | yes | 2 x Carbo    | 46                     | 6                     | retroperitoneal and iliacal lymph nodes, 3.5 cm | 3 x PEB               |
| 20 | 2.5              | no  | Surveillance | 41                     | 12                    | retroperitoneal lymph nodes                     | n/a                   |

|    |     |     |              |     |                                                                             |                                                   |
|----|-----|-----|--------------|-----|-----------------------------------------------------------------------------|---------------------------------------------------|
| 21 | 5.2 | no  | Surveillance | 52  | 18 retroperitoneal lymph nodes                                              | 3 x PEB                                           |
| 22 | 4.6 | no  | Surveillance | 46  | 12 retroperitoneal lymph nodes, 3.1cm                                       | Chemotherapy                                      |
| 23 | 1.8 | no  | Surveillance | 31  | 12 retroperitoneal lymph nodes, 129mm                                       | 3 x PEB                                           |
| 24 | 3.5 | no  | Surveillance | 51  | 12 retroperitoneal lymph nodes                                              | Radiotherapy 20 Gy (field)+ boost (involved node) |
| 25 | 6   | yes | Surveillance | 50  | 12 retroperitoneal lymph nodes, 7 cm                                        | 3 x PEB                                           |
| 26 | 4.5 | no  | Surveillance | 36  | 6 retroperitoneal lymph nodes                                               | Radiotherapy 36 Gy                                |
| 27 | 3   | no  | Surveillance | 39  | 12 retroperitoneal lymph nodes, 2cm                                         | 3 x PEB                                           |
| 28 | 0.9 | yes | Surveillance | 52  | 6 retroperitoneal lymph nodes, 132mm                                        | Radiotherapy 36 Gy                                |
| 29 | 3   | no  | Surveillance | 45  | 12 retroperitoneal lymph nodes                                              | 3 x PEB                                           |
| 30 | 2.4 | no  | Surveillance | 46  | 6 retroperitoneal lymph nodes                                               | 3 x PEB                                           |
| 31 | 3   | no  | Surveillance | 40  | 6 retroperitoneal lymph nodes 5cm<br>retroperitoneal lymph nodes + pulmonal | 3 x PEB                                           |
| 32 | 3.6 | no  | Surveillance | 26  | 12 metastases                                                               | 3 x PEB                                           |
| 33 | 2   | no  | Surveillance | 40  | 6 retroperitoneal lymph nodes, 2cm                                          | 3 x PEB                                           |
| 34 | 4.5 | yes | Surveillance | 33  | 6 retroperitoneal lymph nodes                                               | Radiotherapy 30 Gy                                |
| 35 | 2.2 | yes | Surveillance | 26  | 12 retroperitoneal lymph nodes                                              | 3 x PEB                                           |
| 36 | 2   | no  | Surveillance | 36  | 6 retroperitoneal lymph nodes                                               | 3 x PEB                                           |
| 37 | 1.2 | no  | Surveillance | 33  | 48 retroperitoneal lymph nodes, 2.3cm                                       | 3 x PEB                                           |
| 38 | 1.5 | yes | Surveillance | 47  | 12 retroperitoneal lymph nodes                                              | 3 x PEB                                           |
| 39 | 3   | no  | Surveillance | 41  | 12 retroperitoneal lymph nodes                                              | Radiotherapy, 36 Gy                               |
| 40 | n/a | n/a | Surveillance | n/a | 60 retroperitoneal lymph nodes                                              | 3 x PEB                                           |
| 41 | n/a | n/a | radiotherapy | n/a | 6 bone metastases                                                           | PEI chemotherapy plus surgery                     |

n/a not available; PEB chemotherapy with Cisplatin, etoposide and Bleomycin; Carbo Carboplatin; pcRLA postchemo retroperitoneal lymph node dissection; yrs years; mon months; RTI rete testis invasion
